# Supplementary material
Source: PubMed Central journal article supplement (PMC4410017)
Supplement: NIHMS679927-supplement-supplement_1.pdf [file NIHMS679927-supplement-supplement_1.pdf]

**Supplemental Table 1. Models to assess effects of Serum TMA on Coronary Plaque Parameters in HIV-Infected Subjects**

| <b>Supplemental Table 1a.</b> |                                                            |         |                                                                        |         |                                                                            |         |                                                                       |         |                                                                     |         |
|-------------------------------|------------------------------------------------------------|---------|------------------------------------------------------------------------|---------|----------------------------------------------------------------------------|---------|-----------------------------------------------------------------------|---------|---------------------------------------------------------------------|---------|
|                               | Calcium Score<br>(n=150)<br>(R <sup>2</sup> =0.05; P=0.02) |         | Total Plaque Segments (#)<br>(n=143)<br>(R <sup>2</sup> =0.04; P=0.05) |         | Calcified Plaque Segments (#)<br>(n=143)<br>(R <sup>2</sup> =0.04; P=0.07) |         | Calcium Volume of Plaque<br>(n=142)<br>(R <sup>2</sup> =0.04; P=0.06) |         | Calcium Mass of Plaque<br>(n=142)<br>(R <sup>2</sup> =0.05; P=0.03) |         |
|                               | $\beta$ Estimate                                           | P Value | $\beta$ Estimate                                                       | P Value | $\beta$ Estimate                                                           | P Value | $\beta$ Estimate                                                      | P Value | $\beta$ Estimate                                                    | P Value |
| <b>Variables</b>              |                                                            |         |                                                                        |         |                                                                            |         |                                                                       |         |                                                                     |         |
| Serum TMA                     | 0.9753                                                     | 0.008   | 0.8628                                                                 | 0.02    | 0.1680                                                                     | 0.05    | 20.5065                                                               | 0.02    | 5.6769                                                              | 0.01    |
| HDL                           | -0.0028                                                    | 0.81    | 0.0008                                                                 | 0.095   | -0.0024                                                                    | 0.39    | 0.0333                                                                | 0.91    | 0.0073                                                              | 0.92    |

| <b>Supplemental Table 1b.</b> |                                                            |         |                                                                        |         |                                                                            |         |                                                                       |         |                                                                     |         |
|-------------------------------|------------------------------------------------------------|---------|------------------------------------------------------------------------|---------|----------------------------------------------------------------------------|---------|-----------------------------------------------------------------------|---------|---------------------------------------------------------------------|---------|
|                               | Calcium Score<br>(n=149)<br>(R <sup>2</sup> =0.06; P=0.01) |         | Total Plaque Segments (#)<br>(n=142)<br>(R <sup>2</sup> =0.04; P=0.05) |         | Calcified Plaque Segments (#)<br>(n=142)<br>(R <sup>2</sup> =0.03; P=0.10) |         | Calcium Volume of Plaque<br>(n=141)<br>(R <sup>2</sup> =0.05; P=0.04) |         | Calcium Mass of Plaque<br>(n=141)<br>(R <sup>2</sup> =0.06; P=0.02) |         |
|                               | $\beta$ Estimate                                           | P Value | $\beta$ Estimate                                                       | P Value | $\beta$ Estimate                                                           | P Value | $\beta$ Estimate                                                      | P Value | $\beta$ Estimate                                                    | P Value |
| <b>Variables</b>              |                                                            |         |                                                                        |         |                                                                            |         |                                                                       |         |                                                                     |         |
| Serum TMA                     | 0.9629                                                     | 0.008   | 0.8572                                                                 | 0.02    | 0.1810                                                                     | 0.03    | 19.4624                                                               | 0.03    | 5.4203                                                              | 0.01    |
| HCV                           | -0.2335                                                    | 0.32    | -0.0837                                                                | 0.72    | 0.0038                                                                     | 0.95    | -5.8033                                                               | 0.31    | -1.4887                                                             | 0.30    |

| <b>Supplemental Table 1c.</b> |                                                            |         |                                                                        |         |                                                                            |         |                                                                       |         |                                                                     |         |
|-------------------------------|------------------------------------------------------------|---------|------------------------------------------------------------------------|---------|----------------------------------------------------------------------------|---------|-----------------------------------------------------------------------|---------|---------------------------------------------------------------------|---------|
|                               | Calcium Score<br>(n=150)<br>(R <sup>2</sup> =0.06; P=0.01) |         | Total Plaque Segments (#)<br>(n=143)<br>(R <sup>2</sup> =0.05; P=0.03) |         | Calcified Plaque Segments (#)<br>(n=143)<br>(R <sup>2</sup> =0.03; P=0.10) |         | Calcium Volume of Plaque<br>(n=142)<br>(R <sup>2</sup> =0.04; P=0.06) |         | Calcium Mass of Plaque<br>(n=142)<br>(R <sup>2</sup> =0.05; P=0.03) |         |
|                               | $\beta$ Estimate                                           | P Value | $\beta$ Estimate                                                       | P Value | $\beta$ Estimate                                                           | P Value | $\beta$ Estimate                                                      | P Value | $\beta$ Estimate                                                    | P Value |
| <b>Variables</b>              |                                                            |         |                                                                        |         |                                                                            |         |                                                                       |         |                                                                     |         |
| Serum TMA                     | 1.0240                                                     | 0.005   | 0.8896                                                                 | 0.01    | 0.1791                                                                     | 0.03    | 20.3418                                                               | 0.02    | 5.7008                                                              | 0.008   |
| PI Use                        | 0.2261                                                     | 0.27    | 0.2162                                                                 | 0.29    | -0.0140                                                                    | 0.77    | 0.2881                                                                | 0.95    | 0.5320                                                              | 0.67    |

| <b>Supplemental Table 1d.</b> |                                                            |         |                                                                        |         |                                                                            |         |                                                                       |         |                                                                     |         |
|-------------------------------|------------------------------------------------------------|---------|------------------------------------------------------------------------|---------|----------------------------------------------------------------------------|---------|-----------------------------------------------------------------------|---------|---------------------------------------------------------------------|---------|
|                               | Calcium Score<br>(n=150)<br>(R <sup>2</sup> =0.06; P=0.01) |         | Total Plaque Segments (#)<br>(n=143)<br>(R <sup>2</sup> =0.05; P=0.03) |         | Calcified Plaque Segments (#)<br>(n=143)<br>(R <sup>2</sup> =0.04; P=0.05) |         | Calcium Volume of Plaque<br>(n=142)<br>(R <sup>2</sup> =0.06; P=0.02) |         | Calcium Mass of Plaque<br>(n=142)<br>(R <sup>2</sup> =0.06; P=0.01) |         |
|                               | $\beta$ Estimate                                           | P Value | $\beta$ Estimate                                                       | P Value | $\beta$ Estimate                                                           | P Value | $\beta$ Estimate                                                      | P Value | $\beta$ Estimate                                                    | P Value |
| <b>Variables</b>              |                                                            |         |                                                                        |         |                                                                            |         |                                                                       |         |                                                                     |         |
| Serum TMA                     | 0.9442                                                     | 0.009   | 0.8042                                                                 | 0.02    | 0.1680                                                                     | 0.05    | 18.5666                                                               | 0.03    | 5.2087                                                              | 0.02    |
| ATV Use                       | -0.2789                                                    | 0.23    | -0.2712                                                                | 0.24    | -0.0662                                                                    | 0.22    | -8.7318                                                               | 0.12    | -2.1289                                                             | 0.13    |

| <b>Supplemental Table 1e.</b> |                                                            |         |                                                                         |         |                                                                            |         |                                                                       |         |                                                                     |         |
|-------------------------------|------------------------------------------------------------|---------|-------------------------------------------------------------------------|---------|----------------------------------------------------------------------------|---------|-----------------------------------------------------------------------|---------|---------------------------------------------------------------------|---------|
|                               | Calcium Score<br>(n=150)<br>(R <sup>2</sup> =0.06; P=0.01) |         | Total Plaque Segments (#)<br>(n=143)<br>(R <sup>2</sup> =0.07; P=0.006) |         | Calcified Plaque Segments (#)<br>(n=143)<br>(R <sup>2</sup> =0.03; P=0.10) |         | Calcium Volume of Plaque<br>(n=142)<br>(R <sup>2</sup> =0.04; P=0.06) |         | Calcium Mass of Plaque<br>(n=142)<br>(R <sup>2</sup> =0.05; P=0.03) |         |
|                               | $\beta$ Estimate                                           | P Value | $\beta$ Estimate                                                        | P Value | $\beta$ Estimate                                                           | P Value | $\beta$ Estimate                                                      | P Value | $\beta$ Estimate                                                    | P Value |
| <b>Variables</b>              |                                                            |         |                                                                         |         |                                                                            |         |                                                                       |         |                                                                     |         |
| Serum TMA                     | 1.1114                                                     | 0.003   | 1.0702                                                                  | 0.004   | 0.1831                                                                     | 0.04    | 20.3927                                                               | 0.02    | 5.6282                                                              | 0.01    |
| NNRTI use                     | -0.2296                                                    | 0.30    | -0.4480                                                                 | 0.04    | -0.0041                                                                    | 0.94    | -0.1778                                                               | 0.97    | 0.0086                                                              | 0.99    |

| <b>Supplemental Table 1f.</b> |                                                                    |                |                                                                               |                |                                                                                   |                |                                                                              |                |                                                                            |                |
|-------------------------------|--------------------------------------------------------------------|----------------|-------------------------------------------------------------------------------|----------------|-----------------------------------------------------------------------------------|----------------|------------------------------------------------------------------------------|----------------|----------------------------------------------------------------------------|----------------|
|                               | <b>Calcium Score<br/>(n=150)<br/>(R<sup>2</sup>=0.07; P=0.005)</b> |                | <b>Total Plaque Segments (#)<br/>(n=143)<br/>(R<sup>2</sup>=0.06; P=0.01)</b> |                | <b>Calcified Plaque Segments (#)<br/>(n=143)<br/>(R<sup>2</sup>=0.03; P=0.10)</b> |                | <b>Calcium Volume of Plaque<br/>(n=142)<br/>(R<sup>2</sup>=0.05; P=0.04)</b> |                | <b>Calcium Mass of Plaque<br/>(n=142)<br/>(R<sup>2</sup>=0.06; P=0.02)</b> |                |
|                               | <b>β Estimate</b>                                                  | <b>P Value</b> | <b>β Estimate</b>                                                             | <b>P Value</b> | <b>β Estimate</b>                                                                 | <b>P Value</b> | <b>β Estimate</b>                                                            | <b>P Value</b> | <b>β Estimate</b>                                                          | <b>P Value</b> |
| <b>Variables</b>              |                                                                    |                |                                                                               |                |                                                                                   |                |                                                                              |                |                                                                            |                |
| Serum TMA                     | 1.1110                                                             | 0.002          | 0.9819                                                                        | 0.006          | 0.1839                                                                            | 0.03           | 22.0966                                                                      | 0.01           | 6.1404                                                                     | 0.005          |
| EFV use                       | -0.3757                                                            | 0.09           | -0.4074                                                                       | 0.07           | -0.0089                                                                           | 0.87           | -5.7134                                                                      | 0.29           | -1.6196                                                                    | 0.23           |

R<sup>2</sup> represents the coefficient of determination and the proportion of variance explained by the model. P value represents significance by the whole model ANOVA test.

Abbreviations: TMA, trimethylamine; HDL, high-density lipoprotein; HCV, hepatitis C virus; ATV, atazanavir; EFV, efavirenz; NNRTI, non-nucleoside reverse transcriptase inhibitors; PI, protease inhibitors
